# Supplementary material
Source: PubMed Central journal article supplement (PMC3056522)
Supplement: NIHMS276013-supplement-01.pdf [file NIHMS276013-supplement-01.pdf]

## SUPPLEMENTARY ONLINE DATA

# Identification of a cluster of residues in transmembrane segment 6 of domain III of the cockroach sodium channel essential for the action of pyrethroid insecticides

Yuzhe DU\*, Jung-Eun LEE\*, Yoshiko NOMURA\*, Tianxiang ZHANG\*, Boris S. ZHOROV† and Ke DONG\*<sup>1</sup>

\*Department of Entomology, Genetics and Neuroscience Programs, Michigan State University, East Lansing, MI 48824, U.S.A., and †Department of Biochemistry and Biomedical Sciences, 4N59 Health Sciences Centre, McMaster University, 1200 Main Street West, Hamilton, Ontario, Canada, L8N 3Z5

**Table S1** Effects of alanine substitution of residues in IIS6 on the voltage dependence of activation and inactivation

Results are means  $\pm$  S.D. for *n* oocytes. An unpaired Student's *t* test was used to evaluate the significance of changes in mean values. Asterisks indicate significant differences from the wild-type channel as determined by Student's *t* test ( $P < 0.05$ ).

| Sodium channel type | Activation          |                 | Inactivation        |                 | <i>n</i> |
|---------------------|---------------------|-----------------|---------------------|-----------------|----------|
|                     | $V_{0.5}$ (mV)      | <i>k</i> (mV)   | $V_{0.5}$ (mV)      | <i>k</i> (mV)   |          |
| Wild-type           | $-28.23 \pm 0.54$   | $5.09 \pm 0.94$ | $-48.57 \pm 0.13$   | $5.02 \pm 0.18$ | 30       |
| V1510A              | $-24.15 \pm 0.38$   | $5.31 \pm 0.66$ | $-48.50 \pm 1.13$   | $4.95 \pm 0.28$ | 9        |
| F1511I              | $-28.17 \pm 1.07$   | $4.74 \pm 0.94$ | $-45.15 \pm 0.15$   | $5.02 \pm 0.07$ | 9        |
| F1512A              | $-28.94 \pm 1.42$   | $4.69 \pm 0.64$ | $-46.62 \pm 0.46$   | $4.94 \pm 0.35$ | 10       |
| I1513A              | $-23.61 \pm 1.28^*$ | $5.25 \pm 0.33$ | $-49.49 \pm 1.23$   | $4.92 \pm 0.51$ | 6        |
| I1514A              | $-36.40 \pm 2.07^*$ | $6.10 \pm 1.60$ | $-54.22 \pm 0.95^*$ | $4.76 \pm 0.27$ | 12       |
| F1515A              | $-27.49 \pm 1.42$   | $5.08 \pm 0.64$ | $-45.39 \pm 1.09$   | $5.03 \pm 0.15$ | 12       |
| G1516A              | $-17.07 \pm 2.07^*$ | $5.23 \pm 0.55$ | $-51.15 \pm 1.01$   | $4.54 \pm 0.38$ | 30       |
| S1517P              | $-16.98 \pm 0.70^*$ | $3.79 \pm 0.21$ | $-44.46 \pm 0.55$   | $5.43 \pm 0.60$ | 6        |
| F1518A              | $-30.18 \pm 1.83$   | $4.56 \pm 0.06$ | $-49.16 \pm 0.76$   | $4.70 \pm 0.16$ | 10       |
| T1520A              | $-31.26 \pm 0.45$   | $4.24 \pm 0.55$ | $-47.13 \pm 1.01$   | $5.02 \pm 0.22$ | 6        |
| L1521A              | $-19.60 \pm 1.54^*$ | $6.22 \pm 0.52$ | $-54.02 \pm 0.91^*$ | $4.52 \pm 0.32$ | 19       |
| N1522A              | $-20.29 \pm 0.91^*$ | $7.17 \pm 0.40$ | $-59.19 \pm 0.43^*$ | $4.56 \pm 0.22$ | 15       |
| L1523A              | $-27.68 \pm 2.16$   | $5.17 \pm 0.48$ | $-52.89 \pm 0.83$   | $4.07 \pm 0.28$ | 7        |
| F1524A              | $-36.98 \pm 1.61^*$ | $3.38 \pm 0.37$ | $-41.80 \pm 0.83^*$ | $5.77 \pm 0.64$ | 8        |
| I1525A              | $-22.97 \pm 2.27^*$ | $4.51 \pm 1.52$ | $-42.49 \pm 0.39^*$ | $5.57 \pm 0.18$ | 7        |
| G1526A              | $-20.43 \pm 0.53^*$ | $7.71 \pm 0.30$ | $-57.84 \pm 2.28^*$ | $5.83 \pm 0.12$ | 14       |
| V1527A              | $-30.09 \pm 0.78$   | $5.27 \pm 0.63$ | $-55.88 \pm 2.05^*$ | $5.35 \pm 0.61$ | 6        |
| I1528A              | $-38.89 \pm 1.88^*$ | $3.34 \pm 0.32$ | $-47.91 \pm 0.93$   | $4.84 \pm 0.47$ | 12       |
| I1529A              | $-25.40 \pm 1.84$   | $5.03 \pm 0.42$ | $-49.80 \pm 0.90$   | $4.65 \pm 0.23$ | 11       |
| D1530A              | $-22.54 \pm 1.79^*$ | $6.52 \pm 0.70$ | $-54.13 \pm 1.08^*$ | $4.61 \pm 0.18$ | 9        |

**Table S2** Time constants of the decay of pyrethroid-induced tail currents

Type-II pyrethroid (deltamethrin, cypermethrin and fluralinate) -induced tail currents were fitted with bi-exponential functions for the wild-type, G1516A and I1514A channels, but mono-exponential function for F1518A and N1522A channels. Type-I pyrethroid (permethrin, bioresmethrin, fenfluthrin and bioallethrin) -induced tail currents were fitted with single-exponential function for the wild-type and mutant channels. Substitutions F1518A and N1522A almost completely abolished the action of type I pyrethroids, therefore fitting of tail current decay was not possible (–). Results are means  $\pm$  S.D. Asterisks show that the time constant of decay of pyrethroid-induced tail currents in channels was significantly different from the parental channel BgNa<sub>1</sub>-1A ( $P < 0.05$ ; Student's *t* test).

| Pyrethroid    | Wild-type       |                 | G1516A            |                 | F1518A            | N1522A            | I1514A          |                 |
|---------------|-----------------|-----------------|-------------------|-----------------|-------------------|-------------------|-----------------|-----------------|
|               | $\tau_1$ (s)    | $\tau_2$ (s)    | $\tau_1$ (s)      | $\tau_2$ (s)    | $\tau$ (s)        | $\tau$ (s)        | $\tau_1$ (s)    | $\tau_2$ (s)    |
| Deltamethrin  | $1.6 \pm 0.4$   | $0.36 \pm 0.08$ | $1.3 \pm 0.3$     | $0.32 \pm 0.06$ | $0.30 \pm 0.06^*$ | $0.29 \pm 0.03^*$ | $1.8 \pm 0.2$   | $0.43 \pm 0.08$ |
| Cypermethrin  | $1.7 \pm 0.1$   | $0.29 \pm 0.05$ | $1.2 \pm 0.4$     | $0.26 \pm 0.01$ | $0.37 \pm 0.07^*$ | $0.35 \pm 0.06^*$ | $1.9 \pm 0.4$   | $0.36 \pm 0.11$ |
| Fluralinate   | $1.3 \pm 0.5$   | $0.27 \pm 0.06$ | $1.1 \pm 0.5$     | $0.25 \pm 0.02$ | $0.20 \pm 0.03^*$ | $0.28 \pm 0.12^*$ | $1.4 \pm 0.1$   | $0.31 \pm 0.08$ |
| Permethrin    | $0.48 \pm 0.17$ | –               | $0.20 \pm 0.08^*$ | –               | –                 | –                 | $0.35 \pm 0.12$ | –               |
| Bioresmethrin | $0.19 \pm 0.07$ | –               | $0.25 \pm 0.07$   | –               | –                 | –                 | $0.17 \pm 0.04$ | –               |
| Fenfluthrin   | $0.21 \pm 0.06$ | –               | $0.25 \pm 0.07$   | –               | –                 | –                 | $0.26 \pm 0.03$ | –               |
| Bioallethrin  | $0.23 \pm 0.07$ | –               | $0.22 \pm 0.05$   | –               | –                 | –                 | $0.24 \pm 0.06$ | –               |

<sup>1</sup> To whom correspondence should be addressed (email dongk@msu.edu).

**Table S3 Effects of amino acid substitutions I1514, G1516, F1518 and N1522 on the voltage-dependence of activation and inactivation**

Results are means  $\pm$  S.D. for  $n$  oocytes. An unpaired Student's  $t$  test was used to evaluate the significance of changes in mean values. Asterisks indicate significant differences from the wild-type channel as determined by Student's  $t$  test ( $P < 0.05$ ).

| Sodium channel type | Activation          |                 | Inactivation        |                 | $n$ |
|---------------------|---------------------|-----------------|---------------------|-----------------|-----|
|                     | $V_{0.5}$ (mV)      | $k$ (mV)        | $V_{0.5}$ (mV)      | $k$ (mV)        |     |
| Wild-type           | $-28.23 \pm 0.54$   | $5.09 \pm 0.94$ | $-48.57 \pm 0.13$   | $5.02 \pm 0.18$ | 30  |
| I1514A              | $-36.40 \pm 2.07^*$ | $6.10 \pm 1.60$ | $-54.22 \pm 0.95^*$ | $4.76 \pm 0.27$ | 12  |
| I1514V              | $-32.40 \pm 2.93^*$ | $4.77 \pm 1.14$ | $-50.03 \pm 1.26$   | $4.69 \pm 0.22$ | 5   |
| I1514F              | $-33.16 \pm 2.77^*$ | $6.47 \pm 0.63$ | $-53.43 \pm 0.89^*$ | $4.60 \pm 0.12$ | 6   |
| I1514D              | $-33.48 \pm 2.54^*$ | $5.16 \pm 1.73$ | $-54.28 \pm 0.52^*$ | $4.59 \pm 0.21$ | 4   |
| I1514C              | $-37.34 \pm 1.89^*$ | $5.89 \pm 1.34$ | $-51.92 \pm 1.25$   | $4.45 \pm 0.18$ | 7   |
| G1516A              | $-17.07 \pm 2.07^*$ | $5.23 \pm 0.55$ | $-51.15 \pm 1.01$   | $4.54 \pm 0.38$ | 30  |
| G1516D              | $-33.54 \pm 1.79^*$ | $3.88 \pm 0.94$ | $-43.67 \pm 1.49^*$ | $4.73 \pm 0.16$ | 25  |
| G1516N              | $-27.45 \pm 1.67$   | $4.27 \pm 0.59$ | $-42.50 \pm 1.32^*$ | $5.07 \pm 0.47$ | 20  |
| F1518A              | $-30.18 \pm 1.83$   | $4.56 \pm 0.06$ | $-49.16 \pm 0.76$   | $4.70 \pm 0.16$ | 10  |
| F1518W              | $-42.28 \pm 1.50^*$ | $3.27 \pm 0.10$ | $-51.70 \pm 0.42$   | $4.78 \pm 0.29$ | 6   |
| F1518C              | $-27.79 \pm 2.21$   | $5.14 \pm 0.57$ | $-47.36 \pm 1.27$   | $5.00 \pm 0.27$ | 12  |
| F1518D              | $-29.12 \pm 0.83$   | $5.98 \pm 0.40$ | $-48.58 \pm 1.52$   | $4.90 \pm 0.19$ | 9   |
| N1522A              | $-20.29 \pm 0.91^*$ | $7.17 \pm 0.40$ | $-59.19 \pm 0.43^*$ | $4.56 \pm 0.22$ | 15  |
| N1522G              | $-25.79 \pm 2.16$   | $5.68 \pm 0.82$ | $-50.58 \pm 1.32$   | $4.45 \pm 0.32$ | 17  |
| N1522D              | $-29.81 \pm 1.42$   | $5.08 \pm 1.00$ | $-50.03 \pm 0.64$   | $5.00 \pm 0.15$ | 12  |
| N1522K              | $-37.63 \pm 2.66^*$ | $4.45 \pm 0.59$ | $-51.86 \pm 1.21$   | $4.94 \pm 0.23$ | 13  |

Received 14 October 2008/19 January 2009; accepted 20 January 2009

Published as BJ Immediate Publication 20 January 2009, doi:10.1042/BJ20082082
